# Supplementary material
Source: bioRxiv or medRxiv preprint supplement (https://medrxiv.org/highwire/filestream/96261/field_highwire_adjunct_files/0/2020.03.30.20047860-1.pdf)
Supplement: Supplementary file [file 2020.03.30.20047860-1.pdf]

***Modeling social distancing strategies to prevent SARS-CoV2 spread in Israel- A Cost-effectiveness analysis***

*Amir Shlomai MD,PhD, Ari Leshno MD, Ella H. Sklan PhD\*<sup>+</sup>, Moshe Leshno MD,PhD\**

*\* equal contribution <sup>+</sup>Corresponding author*

*Ella H. Sklan [sklan@tauex.tau.ac.il](mailto:sklan@tauex.tau.ac.il)*

**This file includes:**

1. Tables S1-S3
2. Figures S1-S5

|                   | <b>National lockdown</b>    | <b>Social distancing</b>                                                | <b>Isolation</b>                                                        |
|-------------------|-----------------------------|-------------------------------------------------------------------------|-------------------------------------------------------------------------|
| <b>Strategy 1</b> | All susceptible individuals | Individuals that are not under quarantine (have essential occupations). | All infected individuals or individuals at high exposure risk (14 days) |
| <b>Strategy 2</b> | None                        | All susceptible Individuals                                             | All infected Individuals or individuals at high exposure risk (14 days) |

**Table S1. Summary of the two proposed strategies.**

| <b>Strategy 1</b> | <b>Base</b> | <b>Low</b> | <b>High</b> | <b>Comments</b>                                                        |
|-------------------|-------------|------------|-------------|------------------------------------------------------------------------|
| r1_HR_c           | 0.007       | 0.005      | 0.009       | proportion of the population under isolation due to high exposure risk |
| r1_S2             | 0.7         | 0.6        | 0.8         | proportion of the S population under lockdown                          |
| r1_I              | 0.85        | 0.8        | 0.9         | proportion of the I population in isolation                            |
| r1_E              | 0.3         | 0.2        | 0.4         | proportion of the E population in isolation                            |
| <b>Strategy 2</b> | <b>Base</b> | <b>Low</b> | <b>High</b> |                                                                        |
| r2_HR_c           | 0.003       | 0.001      | 0.005       | proportion of the population in isolation due to high exposure risk    |
| r2_S2             | 0           | 0          | 0           | proportion of the S population in national lockdown                    |
| r2_S1             | 0.9         | 0.8        | 1           | proportion of S population to adopt social distancing measures         |
| r2_I              | 0.85        | 0.8        | 0.9         | proportion of the I population in isolation                            |
| r2_E              | 0.3         | 0.2        | 0.4         | proportion of the E population of in isolation                         |

**Table S2. Assumptions according to the two tested strategies.**

|            | Cost (million \$) | Number of deaths | ICER (\$)  |
|------------|-------------------|------------------|------------|
| Strategy 1 | 12,495.0          | 303.5            | -          |
| Strategy 2 | 122.9             | 577.8            | 45,104,156 |

**Table S3. Summary of the costs and number of deaths in each strategy.**

A.

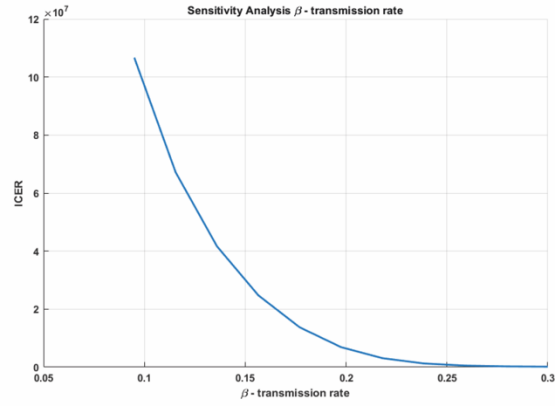

B.

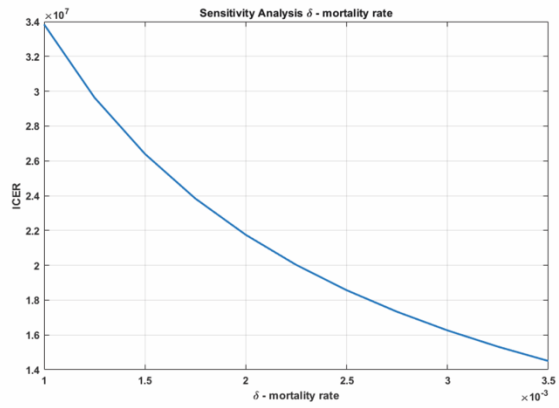

Fig S1

**Figure S1: Sensitivity analysis.** Sensitivity analysis comparing the relative effect of the transmission rate ( $\beta$ , upper panel) and mortality rate ( $\delta$ , lower panel) on the incremental cost effectiveness ratio (ICER).

A.

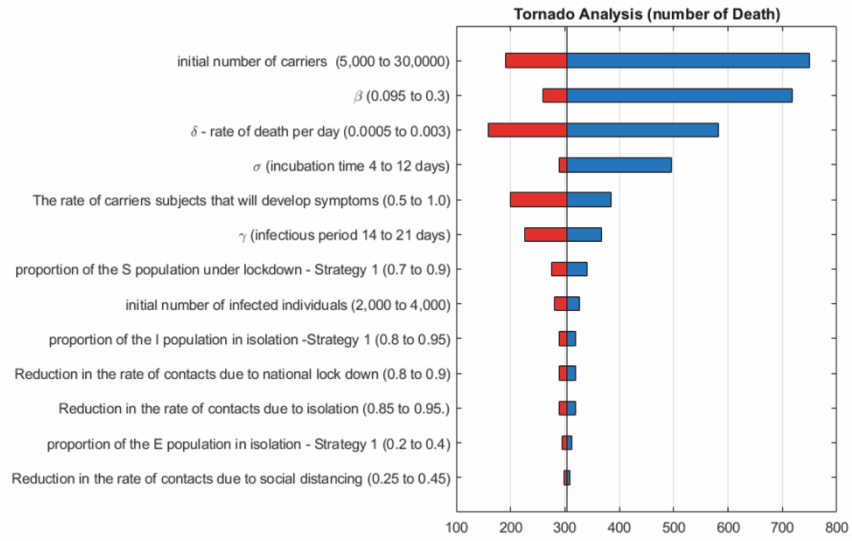

B.

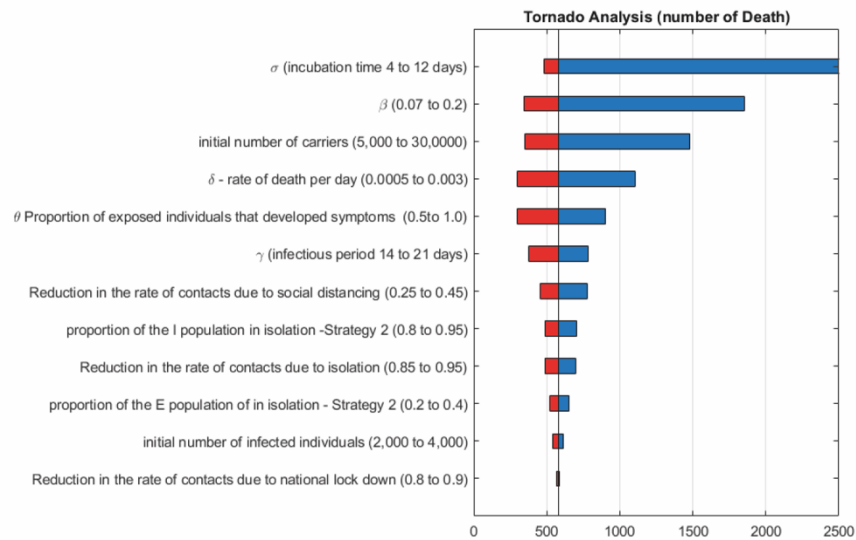

Fig S2

**Figure S2: One-way sensitivity analysis.** Tornado diagram of the number of deaths in strategy 1 (top) and strategy 2 (bottom).

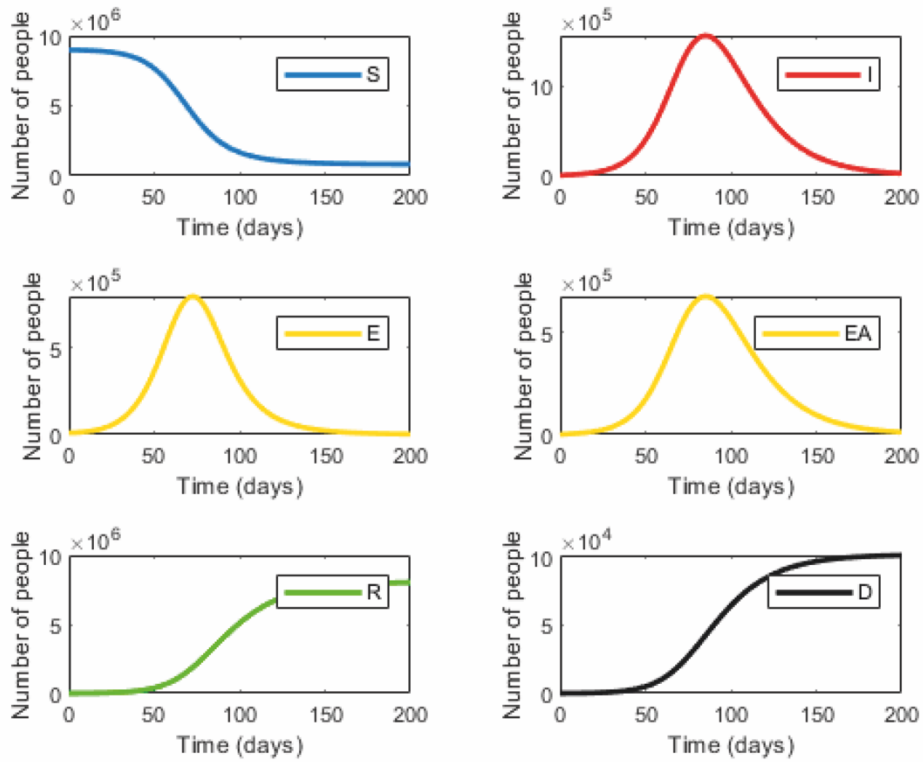

Fig S3

**Figure S3: Infection dynamics without interventions.** The graphs display the dynamics within the six compartments over time. Susceptible (S, blue); Infected (I, red); Carrier (Yellow, E); Carrier asymptomatic (Yellow, EA); Recovered (R, Green), Dead (D, Black).

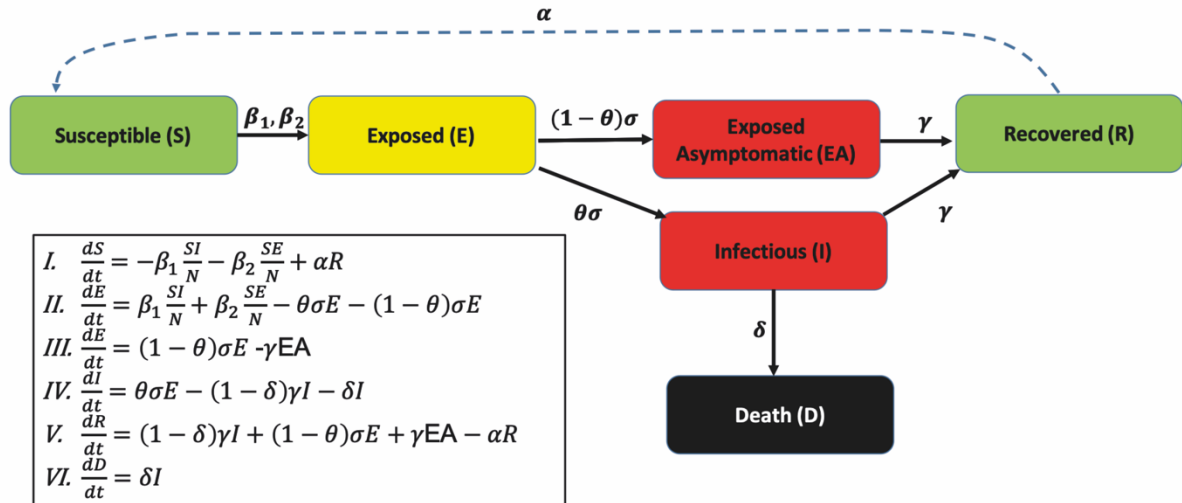

Fig S4

**Figure S4: An illustration of the modified SEIRD model used in this study.**



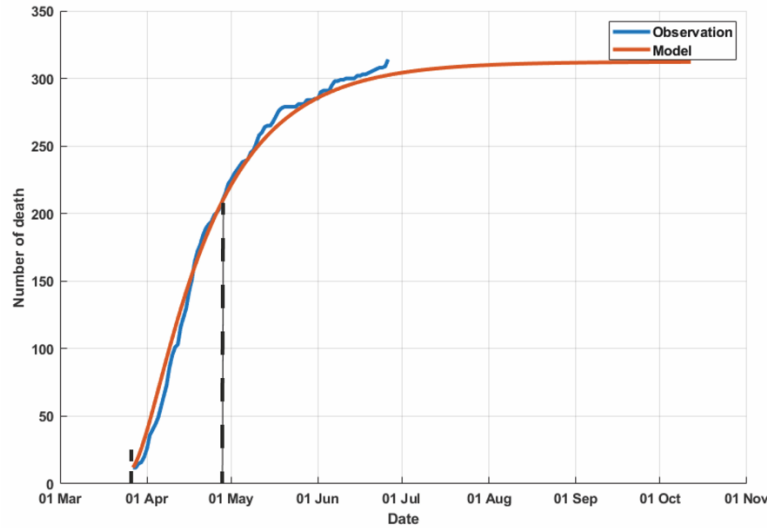

Fig S5

**Figure S5: Calibration analysis of the model parameters.** Comparison of the expected number of deaths according to our model (calibrated on the observed dates between March 21 to April 21, marked with dashed lines) to the actual observed number of deaths in Israel between March 27 to June 30, 2020.
